# Supplementary material for: Recommended number of strides for automatic assessment of gait symmetry and regularity in above-knee amputees by means of accelerometry and autocorrelation analysis
Source: Springer Nature journal article supplement (doi:10.1186/1743-0003-9-11), 2012-02-08

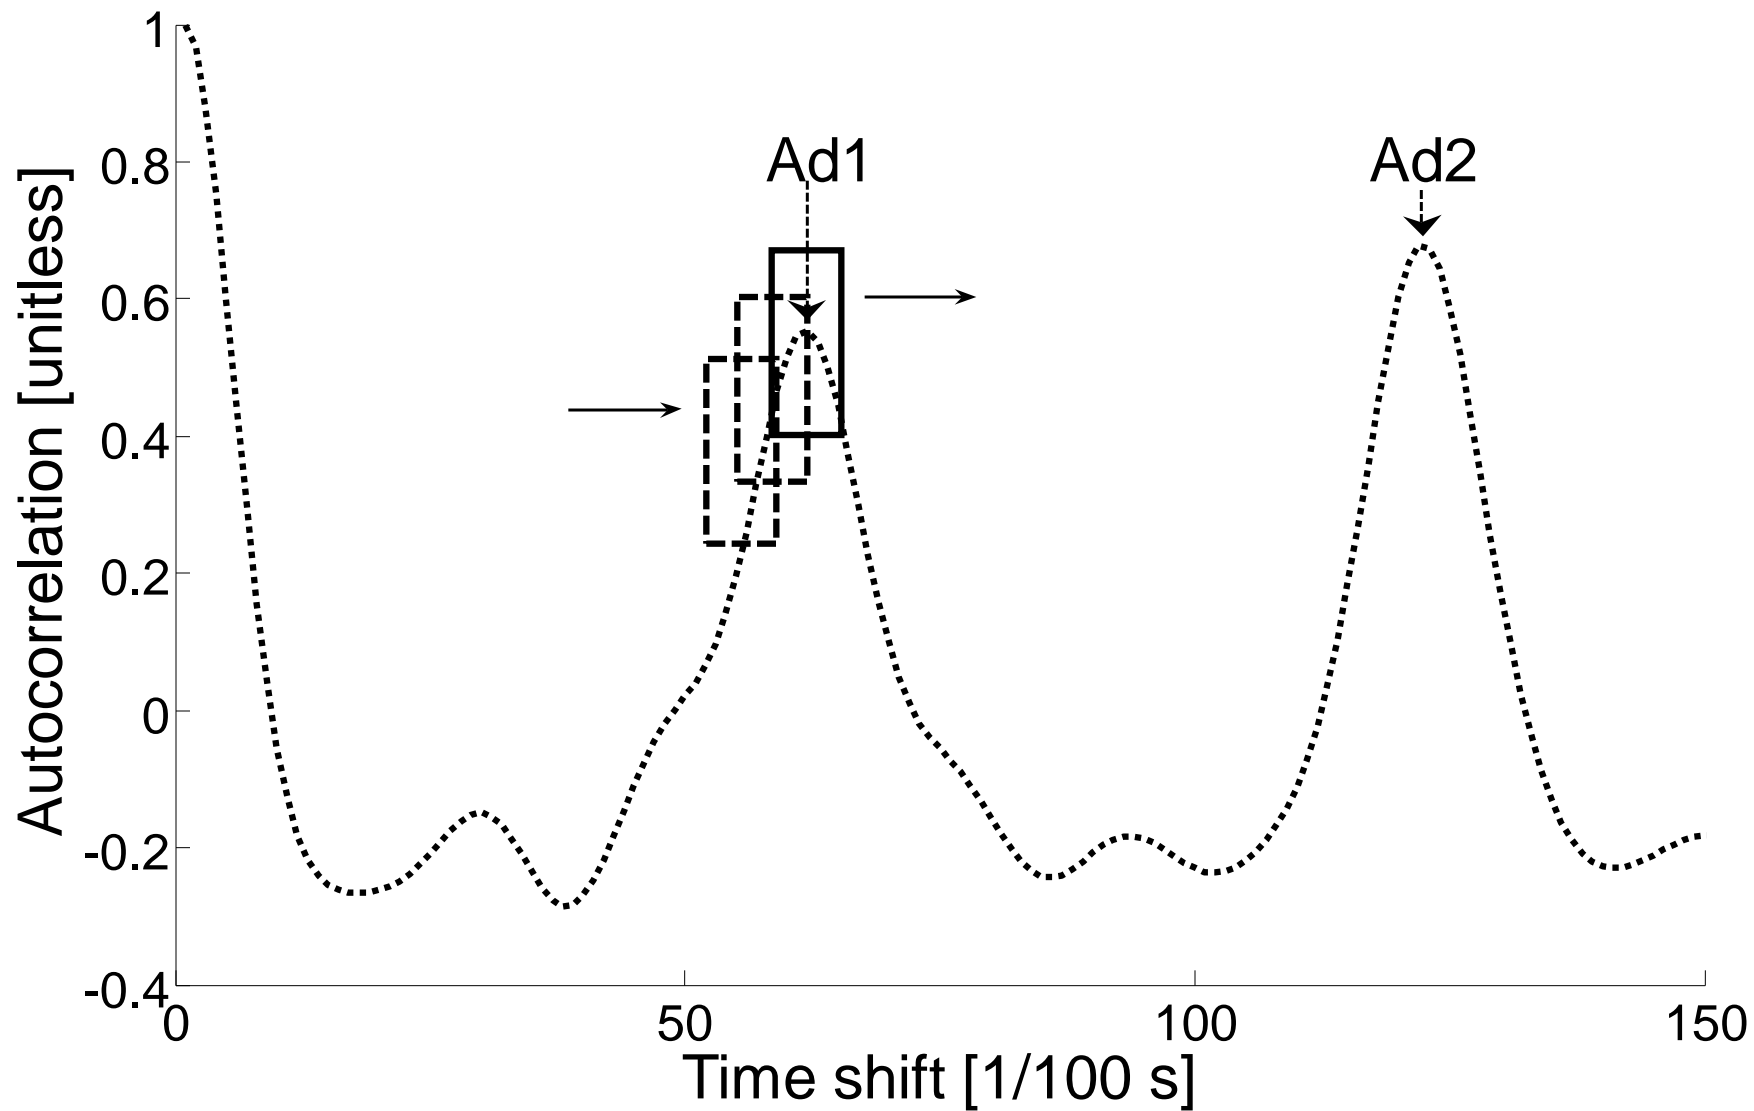

Supplement: 12984_2011_343_MOESM1_ESM.pdf [file 12984_2011_343_MOESM1_ESM.pdf]
