# Supplementary material for: Recommended number of strides for automatic assessment of gait symmetry and regularity in above-knee amputees by means of accelerometry and autocorrelation analysis
Source: Springer Nature journal article supplement (doi:10.1186/1743-0003-9-11), 2012-02-08

### From Ad1<sub>AP</sub> analysis

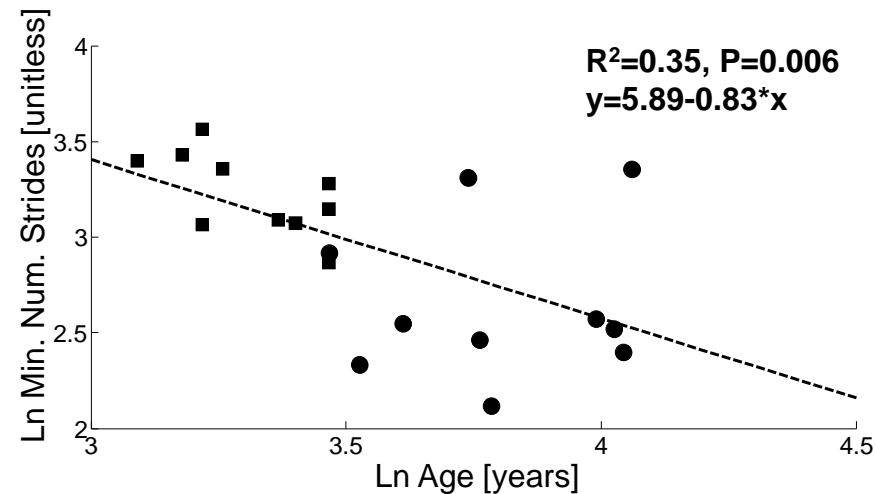

### From Ad2<sub>V</sub> analysis

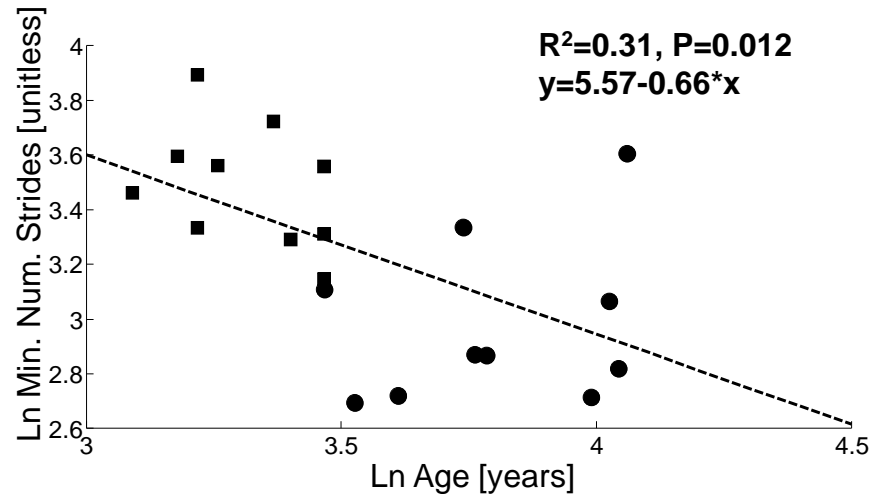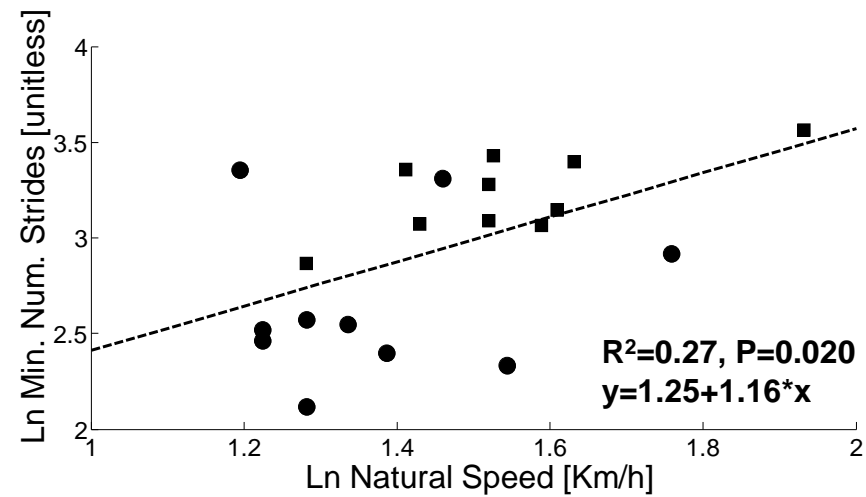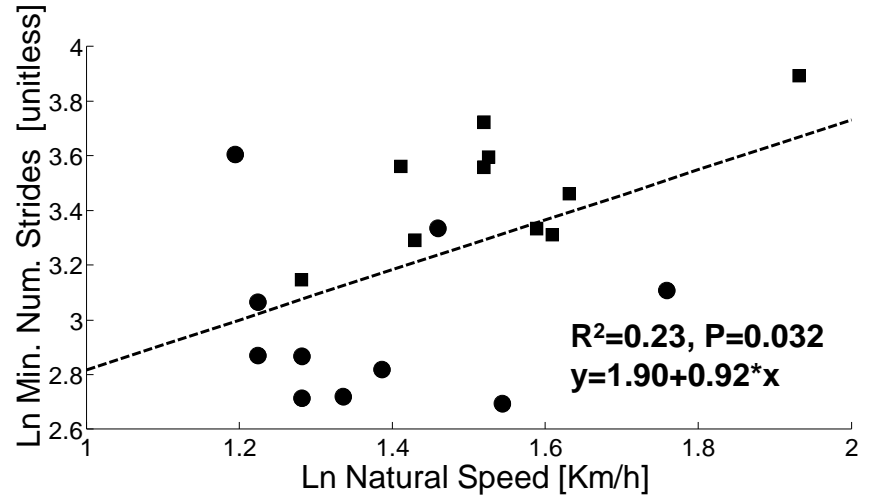

Supplement: 12984_2011_343_MOESM4_ESM.pdf [file 12984_2011_343_MOESM4_ESM.pdf]
